# Supplementary material for: The Enzyme 15-Hydroxyprostaglandin Dehydrogenase Inhibits a Shift to the Mesenchymal Pattern of Trophoblasts and Decidual Stromal Cells Accompanied by Prostaglandin Transporter in Preeclampsia
Source: MDPI journal article supplement (doi:10.3390/ijms24065111), 2023-03-07
Supplement: s1 [file s1]

Table S1. Clinical features of PE and control subjects

| Characteristics          | PE(n=8)      | NA(n=8)      | p       |
|--------------------------|--------------|--------------|---------|
| Age at gestation (years) | 32.45±3.64   | 31.73±4.21   | 0.5867  |
| Gestational age (weeks)  | 34.58±3.04   | 36.58±4.33   | 0.1180  |
| Gravidity                | 3.12±0.71    | 2.73±0.56    | 0.0761  |
| Parity                   | 0.42±0.59    | 0.63±0.44    | 0.2344  |
| BMI (kg/m <sup>2</sup> ) | 28.66±0.84   | 29.51±2.37   | 0.1606  |
| SBP (mmHg)               | 163.18±25.06 | 109.41±19.40 | <0.0001 |
| DBP (mmHg)               | 97.34±12.25  | 71.25±14.38  | <0.0001 |
| Cesarean section (%)     | 100          | 100          | 1       |
